# Supplementary material for: Design and Optimizations of a High-throughput Valve-based Microfluidic Device for Single Cell Compartmentalization and Analysis
Source: Research Square preprint supplement (doi:10.21203/rs.3.rs-119917/v1), 2020-12-11
Supplement: Supplementary file 1 [file 29122c4ea7bc607b6864b1a8.pdf]

## **SUPPLEMENTARY MATERIAL**

### **Design and optimizations of a high-throughput valve-based microfluidic device for single cell compartmentalization and analysis**

Jonathan Briones<sup>1</sup>, Wilfred Espulgar<sup>1</sup>, Shohei Koyama<sup>2</sup>, Hyota Takamatsu<sup>2</sup>, Eiichi Tamiya<sup>3,4</sup>, and Masato Saito<sup>1,3\*</sup>

<sup>1</sup> *Graduate School of Engineering, Osaka University, Suita, Osaka 565-0871, Japan*

<sup>2</sup> *Graduate School of Medicine, Osaka University, Suita, Osaka 565-0871, Japan*

<sup>3</sup> *AIST PhotoBIO-OIL, Osaka University, Suita, Osaka 565-0871, Japan*

<sup>3</sup> *The Institute of Scientific and Industrial Research, Osaka University, Suita, Osaka 565-0871, Japan*

\*Author to whom correspondence should be addressed. Electronic mail: [saitomasato@ap.eng.osaka-u.ac.jp](mailto:saitomasato@ap.eng.osaka-u.ac.jp)

I. Fabrication of master molds for PDMS casting and device assembly

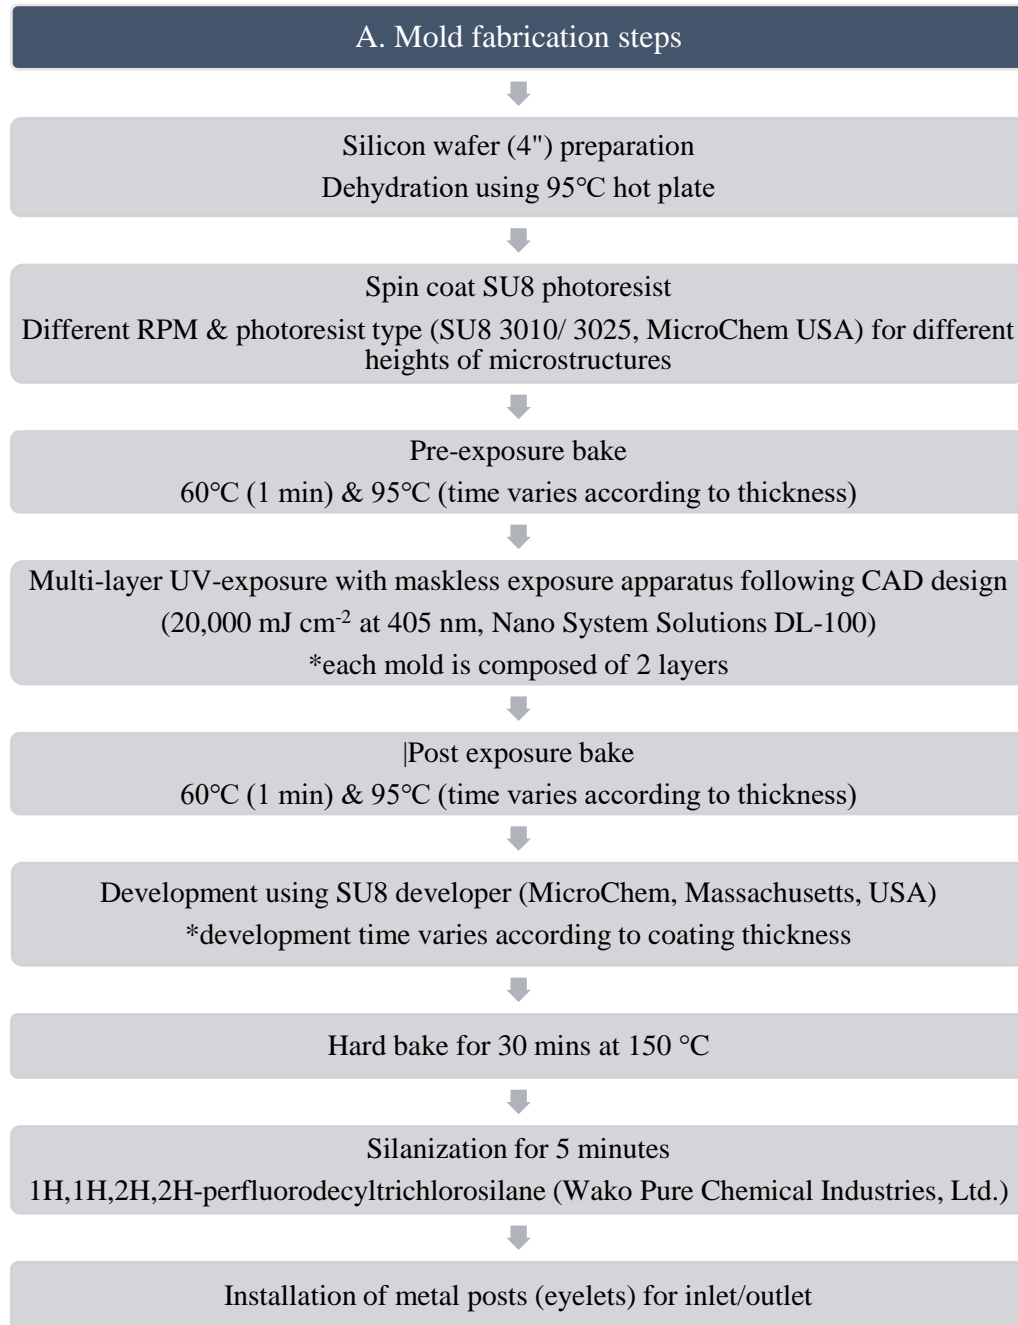

**Figure S1.** Outline of the mold fabrication steps

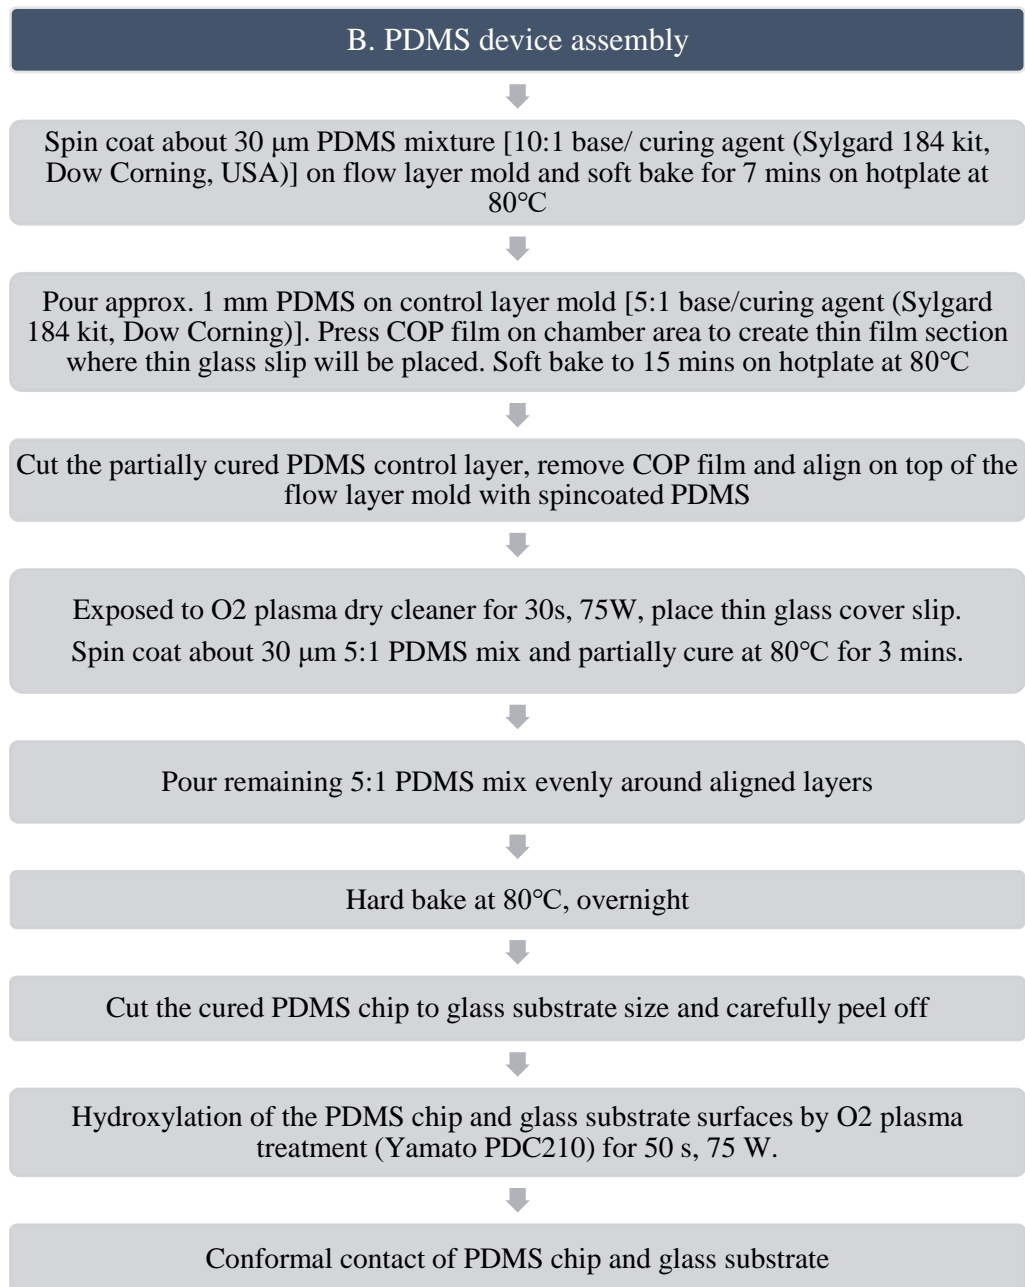

**Figure S2.** Outline of the microfluidic device assembly

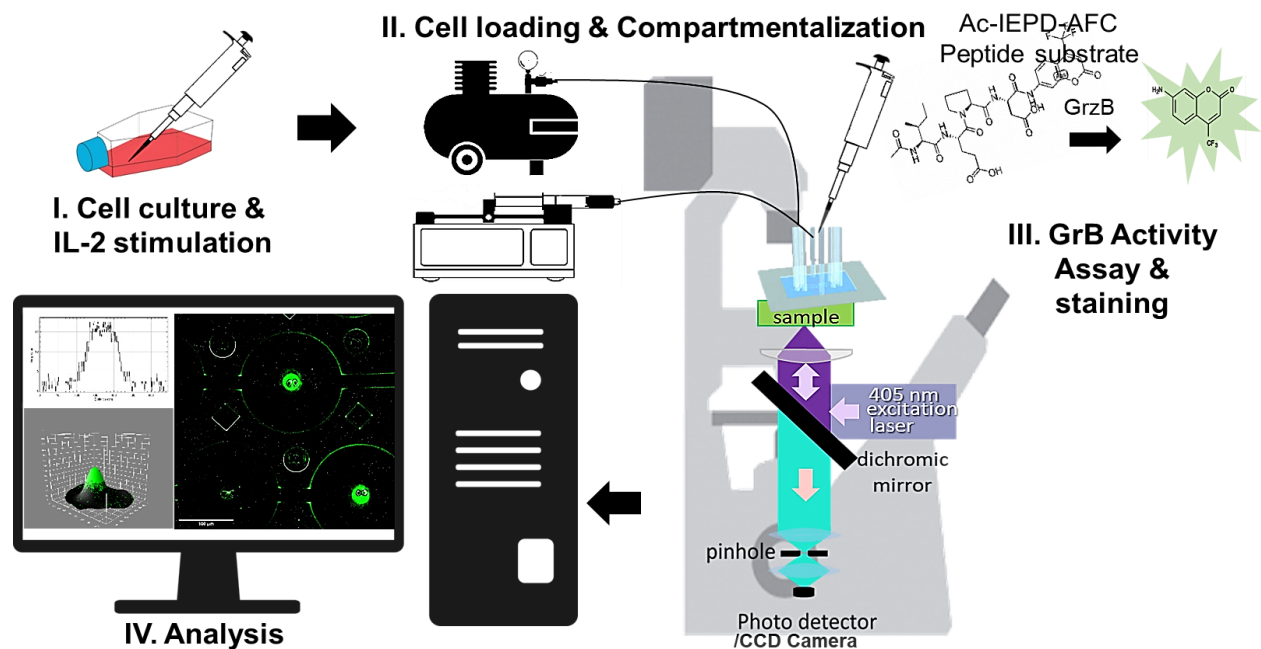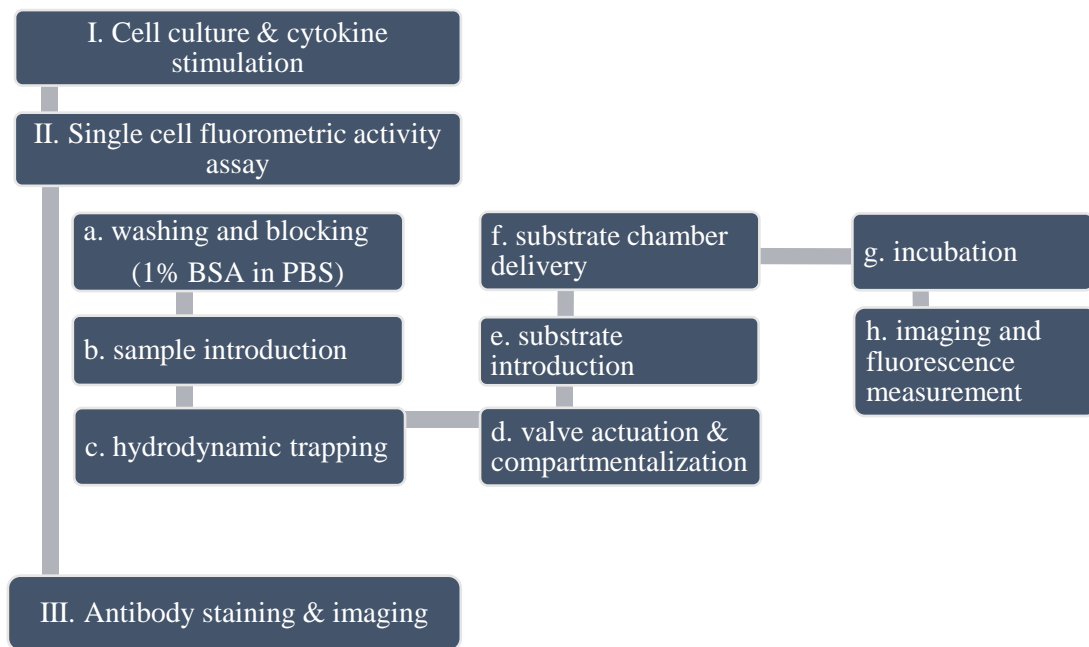

**Figure S4.** Illustration depicting the steps of microfluidic device operation for single cell fluorometric activity assay.

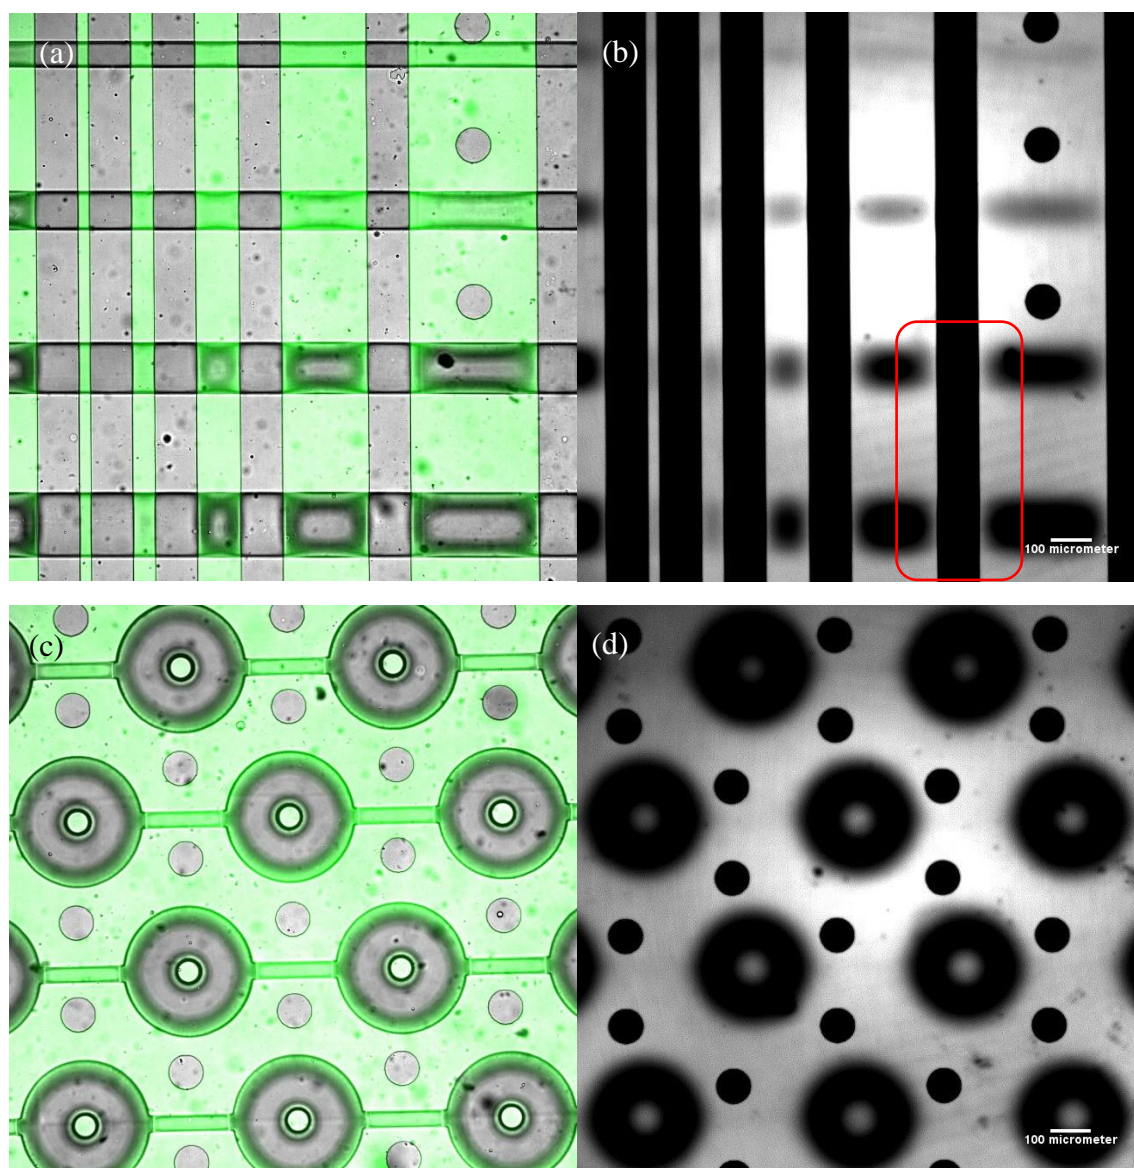

**Figure S3.** Microscope images of fluorescent solution filled microfluidic channels with air actuated valves at 0.14 MPa (a) multicolor (merged) image of the channels and actuated rectangular valves (b) monochrome (488 filter) showing the gaps present at incompletely closed corners (c) multicolor (merged) image of the channels and actuated circular valves (d) monochrome (488 filter) image of sealed microchambers.

## structure A

### Von Mises stress near shaft

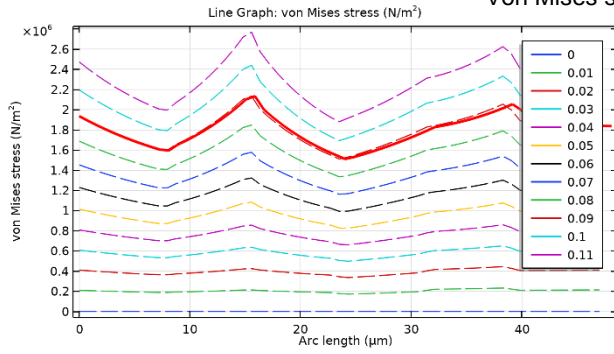

## structure B

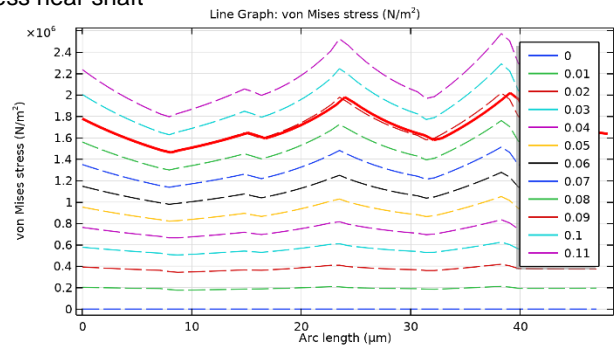

### Von Mises stress in other part

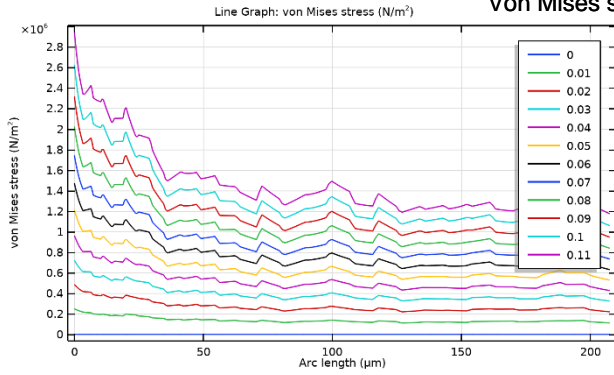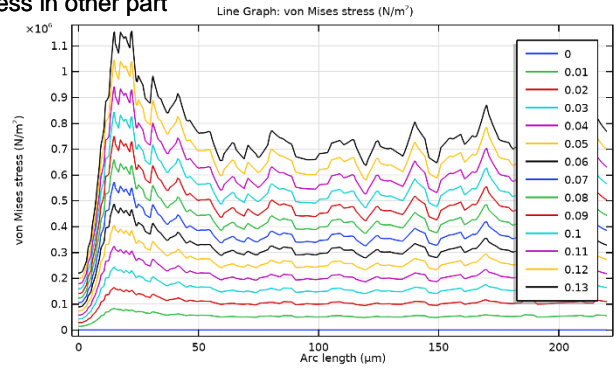

### stored energy density

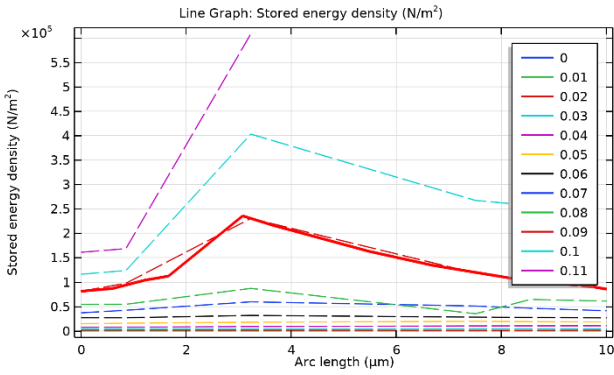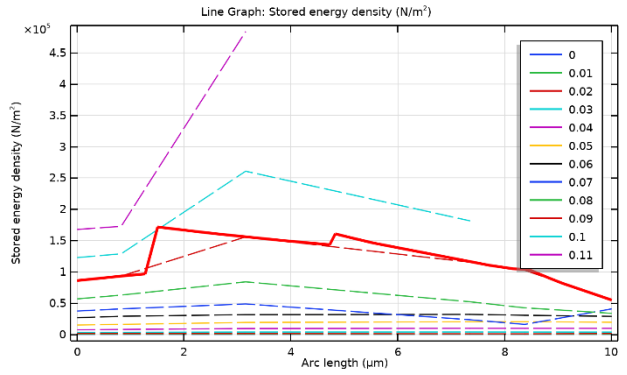

### shear stress

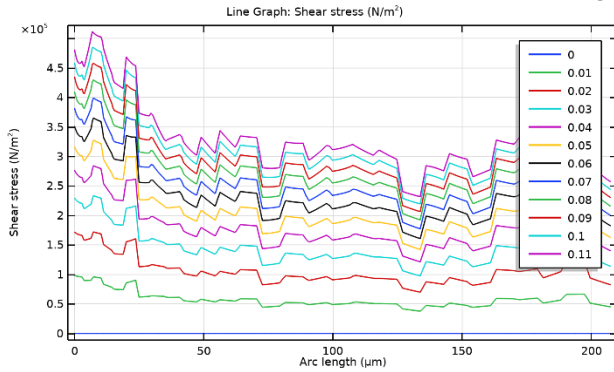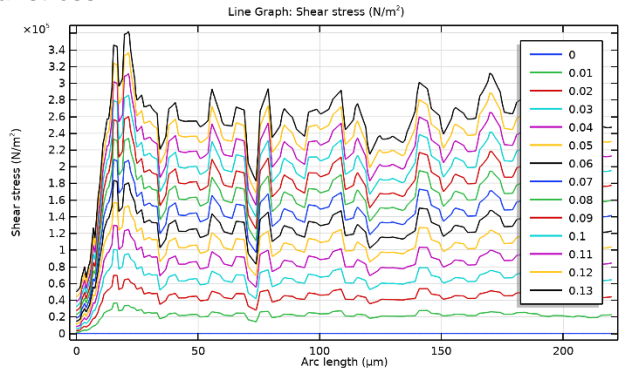

**Figure S5.** Comparison of the von Mises stress, total stored or strain energy density, and shear stress in structures A and B
